# Supplementary figures and images for: Antioxidant and hepatoprotective effects of mixed micellar lipid formulation of phyllanthin and piperine in carbon tetrachloride-induced liver injury in rodents
Source: Royal Society of Chemistry journal article supplement (doi:10.1039/c5fo00947b), 2015-01-01

## $^{13}\text{C}$ NMR of phyllanthin

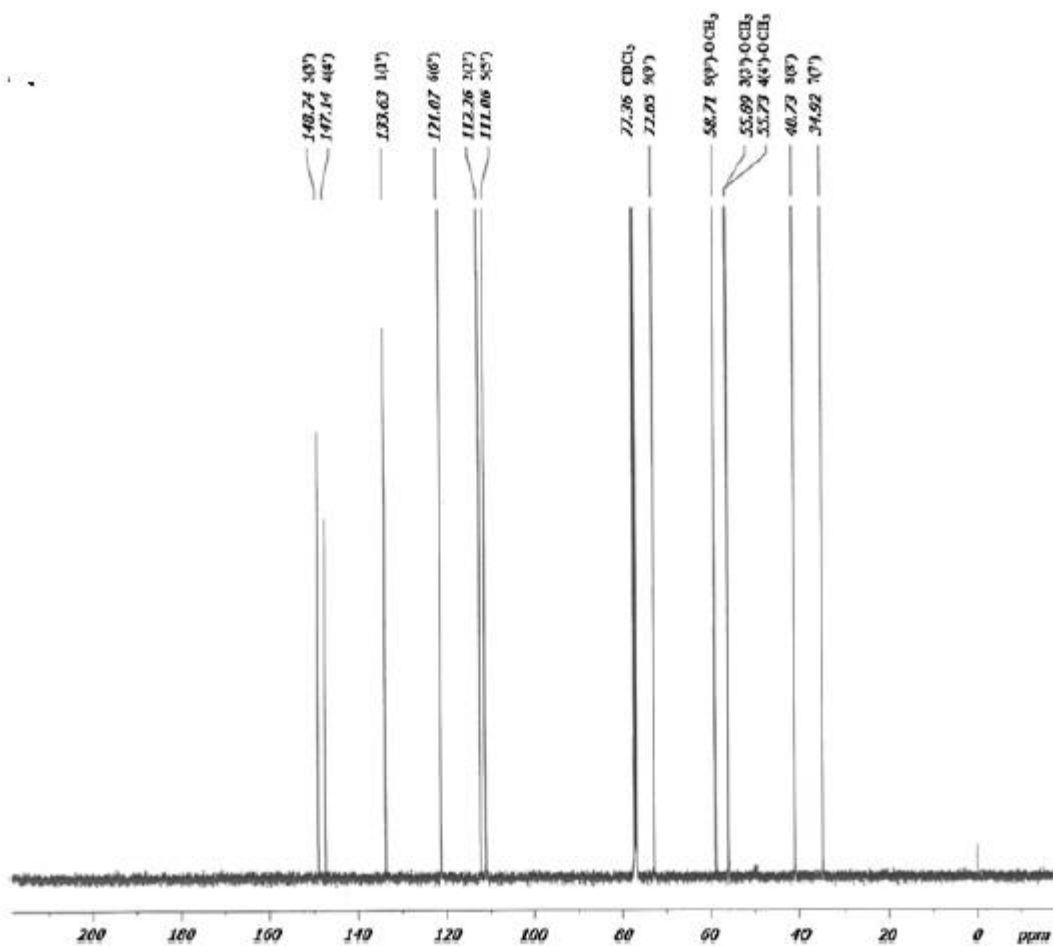

# $^1\text{H}$ NMR of phyllanthin

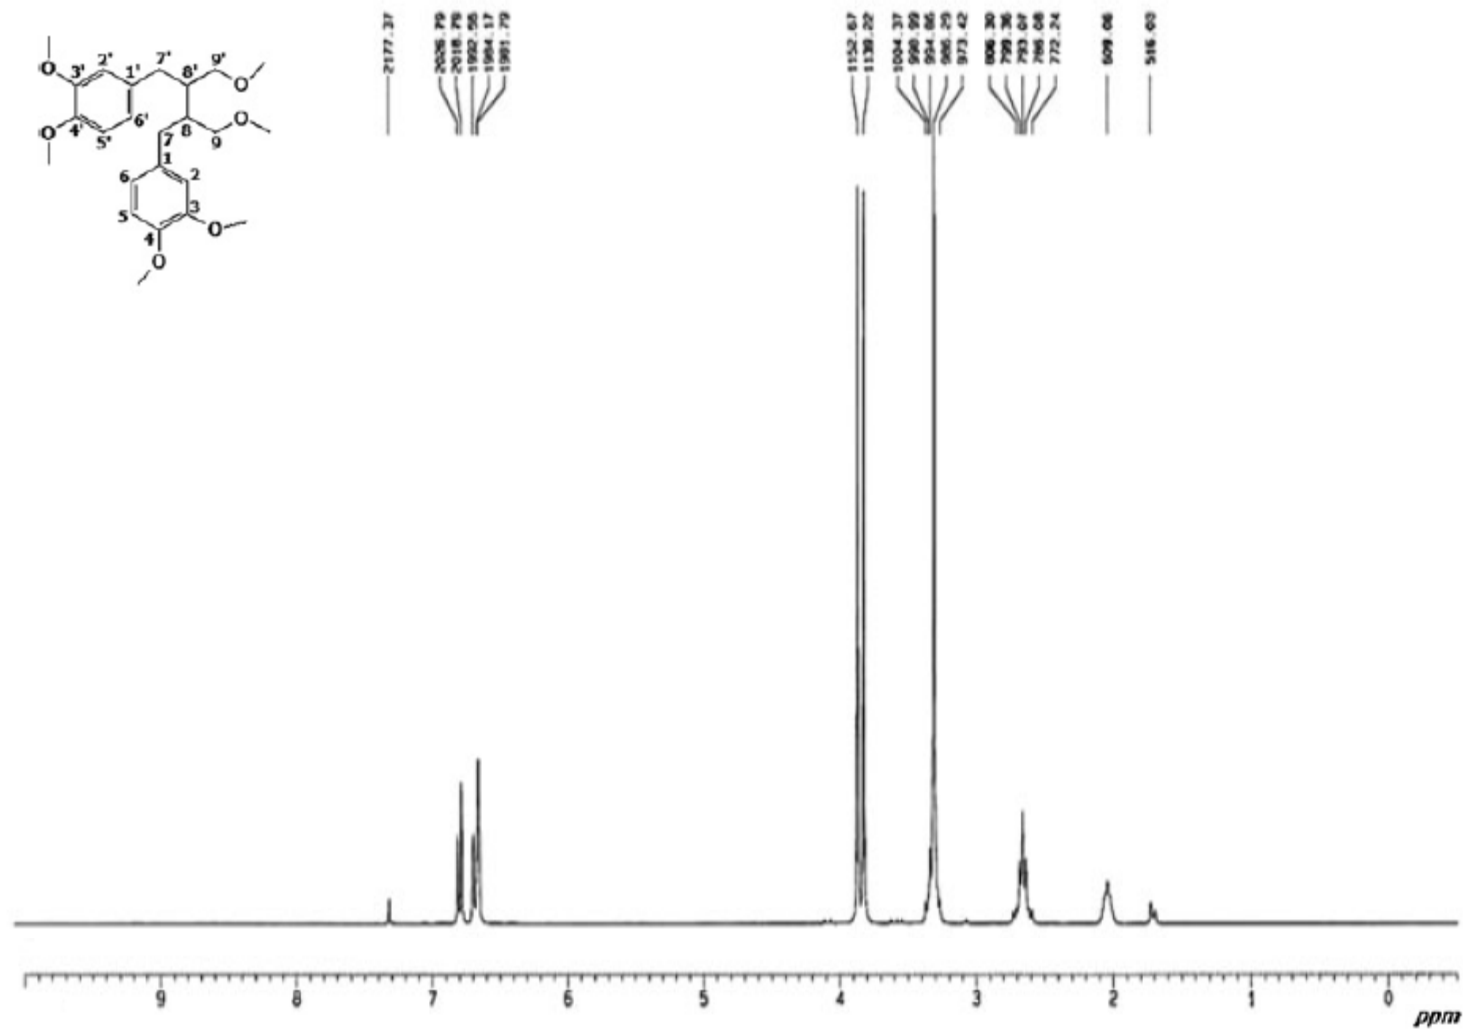

# Mass spectra of phyllanthin

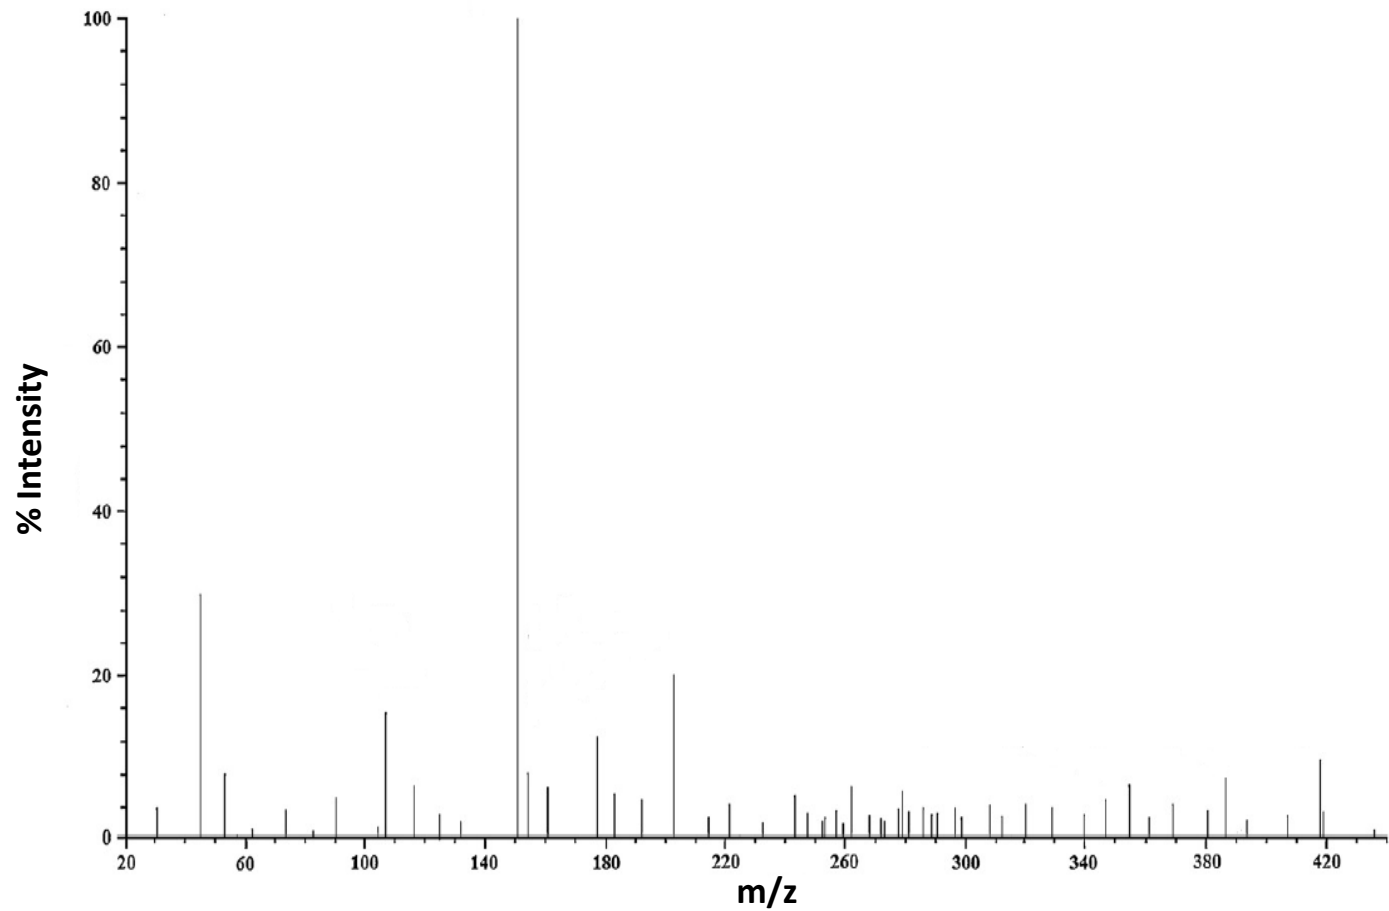

Supplement: c5fo00947b2.pdf [file c5fo00947b2.pdf]
